# Supplementary material
Source: PubMed Central journal article supplement (PMC4070011)
Supplement: NIHMS566879-supplement-Supplementary_data.pdf [file NIHMS566879-supplement-Supplementary_data.pdf]

## SUPPLEMENTAL MATERIALS AND METHODS

### **Cardiomyocyte-specific estrogen receptor alpha increases angiogenesis, lymphangiogenesis and reduces fibrosis in the female mouse heart post myocardial infarction**

Shokoufeh Mahmoodzadeh<sup>1\*</sup>, Joachim Leber<sup>1\*</sup>, Xiang Zhang<sup>1,2\*</sup>, Frédéric Jaisser<sup>3</sup>, Smail Messaoudi<sup>3</sup>, Ingo Morano<sup>4</sup>, Priscilla A. Furth<sup>5</sup>, Elke Dworatzek<sup>1</sup> and Vera Regitz-Zagrosek<sup>1</sup>

<sup>1</sup>Institute of Gender in Medicine and Center for Cardiovascular Research, Charité Universitaetsmedizin Berlin, Germany; <sup>2</sup>Department of Cardiology, The Fourth Affiliated Hospital of Harbin Medical University, Harbin, China; <sup>3</sup>Inserm, U872, Paris, France; <sup>4</sup>Max-Delbrueck-Center for Molecular Medicine, Berlin, Germany; <sup>5</sup>Departments of Oncology and Medicine and the Lombardi Comprehensive Cancer Center, Georgetown University, Washington, DC, USA

\*Authors contributed equally to this work.

#### **Corresponding Author:**

Shokoufeh Mahmoodzadeh, PhD

Institute of Gender in Medicine

Center for Cardiovascular Research

Hessische Str. 3-4, 10115 Berlin, Germany

Tel.: +49 (0)30 450 525 287

Fax: +49 (0)30 450 525 943

E-Mail: [s.mahmoodzadeh@charite.de](mailto:s.mahmoodzadeh@charite.de)

#### **Table of content:**

**I) Materials and Methods**

**II) Table S1**

**III) References**

## **I) Materials and Methods:**

### **Generation of the ER-alpha conditional mouse model (ER $\alpha$ -OE mice)**

The previously described tetO-ER $\alpha$  mouse strain [1] carrying a transgene composed of a coding sequence for murine ER $\alpha$  placed under the regulatory control of a tet-operator promoter (tet-op-ER $\alpha$  mice) (kindly provided by PA Furth, University of Maryland, Baltimore, USA) was crossed with the previously described  $\alpha$ -MHCtTA transactivator mouse strain [2] (kindly provided by GI Fishman, Columbia University, NY). This allows to obtain MHCtTA/tetO-ER $\alpha$  double transgenic (ER $\alpha$ -OE) mice with conditional, cardiomyocyte-specific ER $\alpha$  expression. The “control” genotype refers to the ER $\alpha$ -OE littermates (including wild type and mono-transgenic  $\alpha$ -MHCtTA and tetO-ER $\alpha$  mice). Genomic DNA was isolated from tail biopsies using Phire animal tissue direct PCR kit (Finnzyme, Thermo Scientific, USA) according the manufacturer’s instructions. The presence of the ER $\alpha$ - and tTA-transgenes was detected using following primers by PCR.

#### mER $\alpha$ :

FW: 5′ - CGA GCT CGG TAC CCG GGT CG - 3′

RV: 5′ - GAA CAC AGT GGG CTT GCT TGT TG - 3′

#### mtTA (The Jackson Laboratory):

oIMR8746-FW: 5′ - CGC TGT GGG GCA TTT TAC TTT AG - 3′

oIMR8747-RV: 5′ - CAT GTC CAG ATC GAA ATC GTCC - 3′

#### Internal positive control (The Jackson Laboratory):

FW: 5′ - CAA ATG TTG CTT GTC TGG TGC - 3′

RV: 5′ GTC AGT CGA GTG CAC AGT TT - 3′

The Sizes of PCR-products are as followed: ER $\alpha$ : 350 bp; mtTA: 450 bp; Internal positive control: 200 bp.

## II) Table S1:

List of all primers used in this study:

Primers for quantitative Real-Time polymerase Chain Reaction (qRT-PCR): the qRT-PCR was performed with gene-specific, intron-spanning primers. The annealing temperature was 60°C.

| Gene                                          | Size (bp) | Sequence                                  |
|-----------------------------------------------|-----------|-------------------------------------------|
| <b>m-VEGFa</b>                                | 94        | FW: 5-GCA GCT TGA GTT AAA CGA ACG-3       |
|                                               |           | RV: 5-GGT TCC CGA AAC CCT GAG-3           |
| <b>m-Col I (procollagen, type I, alpha 2)</b> | 124       | FW: 5-TAG TGG TCC TCA AGG CAT CC-3        |
|                                               |           | RV: 5-ACC ATG TAG GCC AGC AAG AC-3        |
| <b>m-Col III (Col3a1)</b>                     | 117       | FW: 5-CTC ACC CTT CTT CAT CCC ACT CTT A-3 |
|                                               |           | RV: 5-ACA TGG TTC TGG CTT CCA GAC AT-3    |
| <b>m-Nppa</b>                                 | 140       | FW: 5-GGG GGT AGG ATT GAC AGG AT-3        |
|                                               |           | RV: 5-ACA CAC CAC AAG GGC TTA GG-3        |
| <b>m-Nppb</b>                                 | 144       | FW: 5-GCA CAA GAT AGA CCG GAT CG-3        |
|                                               |           | RV: 5-CTT CAA AGG TGG TCC CAG AG-3        |
| <b>m-Myh6</b>                                 | 131       | FW: 5-GCC AAG ACT GTC CGG AAT GA-3        |
|                                               |           | RV: 5-TGG AAG ATC ACC CGG GAC TT-3        |
| <b>m-Myh7</b>                                 | 149       | FW: 5-CAA AGG CAA GGC AAA GAA AG-3        |
|                                               |           | RV: 5-TCA CCC CTG GAG ACT TTG TC-3        |
| <b>m-Lyve1</b>                                | 91        | FW: 5-GAA GCA GCT GGG TTT GGA-3           |
|                                               |           | RV: 5-CGT AGC AAA CAG CCA GCA C-3         |
| <b>m-Pecam-1 (CD31)</b>                       | 117       | FW: 5-GGA CCA CGT GTT AGT GTT TCG-3       |
|                                               |           | RV: 5-TTG GGA GTG GAG AAG GAC TC-3        |
| <b>m-Hprt</b>                                 | 78        | FW: 5-GCT TTC CCT GGT TAA GCA GTA CA-3    |
|                                               |           | RV: 5-ACA CTT CGA GAG GTC CTT TTC AC-3    |

## III) References:

- 1 Hruska KS, Tilli MT, Ren S, Cotarla I, Kwong T, et al. (2002) Conditional over-expression of estrogen receptor alpha in a transgenic mouse model. *Transgenic Res* 11: 361-372.
- 2 Yu Z, Redfern CS, Fishman GI (1996) Conditional transgene expression in the heart. *Circ Res* 79: 691-697.
